# Supplementary material for: Computationally enhanced quantitative phase microscopy reveals autonomous oscillations in mammalian cell growth
Source: PubMed Central journal article supplement — Proc Natl Acad Sci U S A. 2020 Oct 21;117(44):27388–99. doi: 10.1073/pnas.2002152117 (PMC7959529; doi:10.1073/pnas.2002152117), 2020-10-21
Supplement: pnas.2002152117.sapp.pdf [file pnas.2002152117.sapp.pdf]

# PNAS

[www.pnas.org](http://www.pnas.org)

Supplementary Information for

Computationally Enhanced Quantitative Phase Microscopy Reveals Autonomous Oscillations in Mammalian Cell Growth

Xili Liu<sup>1</sup>, Seungeun Oh<sup>1</sup>, Leonid Peshkin<sup>1</sup>, Marc W. Kirschner<sup>1,\*</sup>

\* Marc W. Kirschner

Email: [marc@hms.harvard.edu](mailto:marc@hms.harvard.edu)

**This PDF file includes:**

Supplementary text  
Figures S1 to S4  
Tables S1 to S2  
Legends for Movies S1 to S2

**Other supplementary materials for this manuscript include the following:**

Movie S1  
Movie S2  
Dataset S1

## Supplementary Information Text

### Quantification of the extracellular matrix contribution of fibronectin to cell dry mass

The glass bottom plates used in this study were coated with 50  $\mu\text{g/mL}$  fibronectin. Besides the fibronectin coating, cells also secrete more extracellular matrix (ECM) proteins. To estimate how ECM proteins affect the accuracy of cell dry mass quantification, we measured the fibronectin on the glass surface by immunostaining. We monitored HeLa cells by ceQPM for 24 hours, permeabilize and fixed them, and then immunostained them with fibronectin antibody. Despite the uniformity of fibronectin coating, cytoskeleton changes and cell migration rearrange the fibronectin underneath the cell (Fig. A-C). As the background leveling of the QPM image also subtracts the background fibronectin from the cell, the residual fibronectin contributed to the cell dry mass is calculated as

$$M_f = \frac{(\langle I_{cell} - I_{cell\_bg} \rangle - \langle I_{blank} - I_{bg} \rangle) A_{cell} C_f}{\langle I_{blank} - I_{bg} \rangle},$$

where  $I_{cell}$  is the fibronectin intensity underneath the cell,  $I_{blank}$  is the fibronectin intensity in the blank area,  $I_{bg}$  is the background intensity in the control sample without the primary antibody,  $I_{cell\_bg}$  is  $I_{bg}$  within the cell area,  $A_{cell}$  is the cell area,  $C_f$  is the fibronectin concentration on the glass surface at 50  $\mu\text{g/mL}$ , which is 200  $\text{ng/cm}^2$  (Kalaskar, Downes, Murray, Edgar, & Williams, 2013). The segmented cell masks from the 24-hour ceQPM movie were applied to the fibronectin image to obtain the dynamic cell area.

We found fibronectin contributes 1-3 pg to the total cell dry mass, which is not significant comparing to the about 600 pg average cell mass. The variation of fibronectin is less than 1 pg within 24 hours and does not bear any periodic patterns (Fig. D).

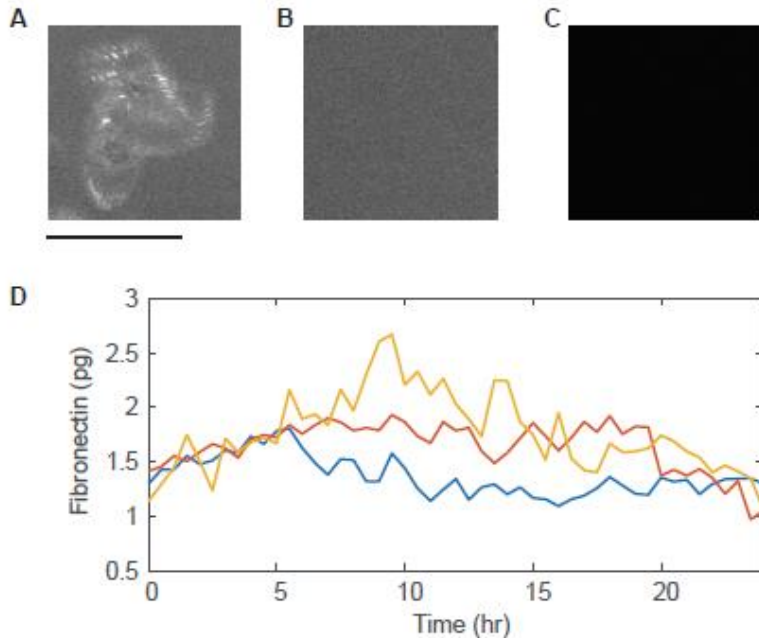

## The goodness of fit of the linear and exponential growth model

Although the measurement error is positively correlated with cell dry mass (Fig. A), the dispersion of the exponential fit does not carry the strong positive correlation (Fig. B), meaning the fluctuations in the cell mass trajectory are not solely due to the measurement error. Thus, we used the nonlinear least-square fit to fit the exponential growth model. Since the linear and exponential growth models have the same number of parameters, the goodness of fit only depends on their Residual Sum of Squares (RSS). We chose the small sample Akaike Information Criterion (AICc) to compare the goodness of fit of the two models (Beier, Burnham, & Anderson, 2001). Using other criteria, such as the Bayesian Information Criterion (BIC), does not affect the result.

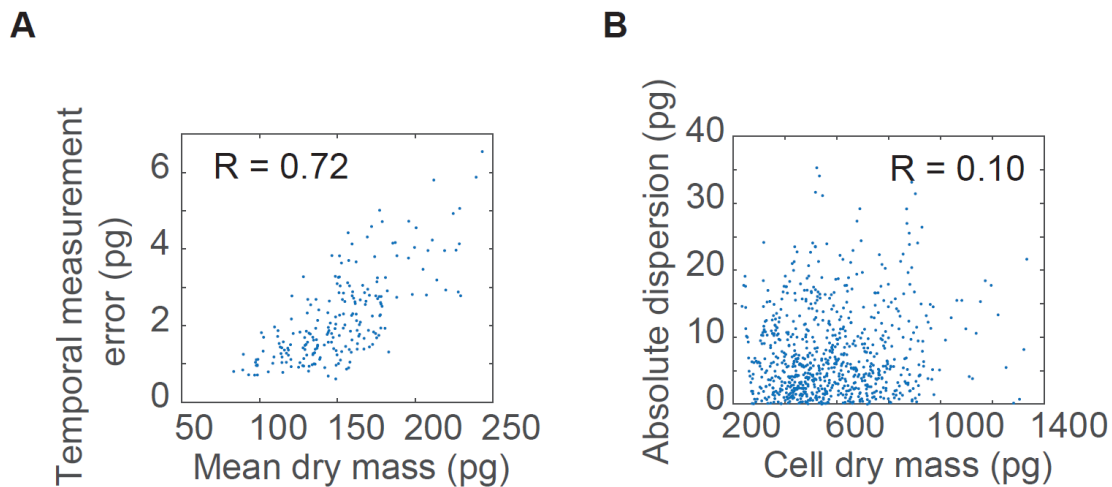

Figure. (A) The strong positive correlation between the mean dry mass and the temporal measurement error. Data is from Table 1 in the main text under 10X magnification. (B) The correlation between the cell dry mass and the absolute dispersion of the exponential fit. Data is from Fig. 4B in the main text with  $AICc_{exp} - AICc_{li} > 100$ ; each data point is from one time point of a single-cell trajectory.

## The effect of data processing on the data power spectrum

We used the long-term fixed-cell data to demonstrate how different data processing steps manipulate the power spectrum of the data and cause diminished or artificial information at certain time scales (see the figure below). The fixed cell trajectories were leveled by subtracting the mean and then underwent different data processing as indicated. The processed trajectories were stitched to estimate the Power Spectral Density (PSD) by using the Welch's method (Matlab's built-in function `pwelch`) with the segment length equal to 100. Taking the difference of adjacent points suppresses the low-frequency noise but greatly amplified the high-frequency noise (note the PSD is in log scale). Cubic spline as an imperfect low pass filter surpasses the high-frequency noise while preserves the low-frequency power. Linear fit in a sliding window or moving average suppresses noise at specific frequencies corresponding to the window size. Combining data smoothing and derivative taking creates an artifactual peak in the power spectrum.

Data processing, especially noise filtering, is commonly applied to single-cell dynamics. But its use is rarely thoroughly examined analytically. The live-cell data carries the information of regulatory changes, stochastic process, and measurement error in the cells over time as well as cell-to-cell variability, which makes it difficult to investigate the effect of data processing

objectively. Thus, we recommend performing the power spectral analysis routinely with a control dataset, such as the fixed-cell data, to dissect potential error and misinterpretation.

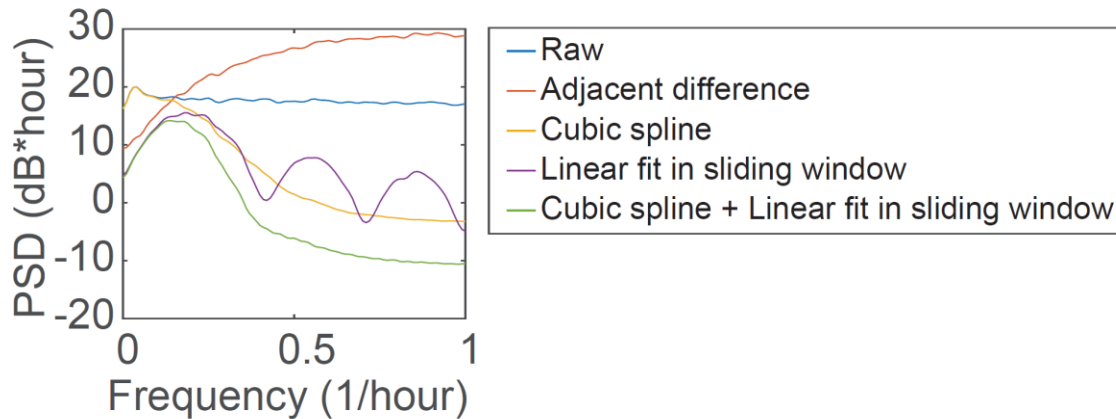

Figure. The effect of data processing on the power spectrum of fixed-cell data. The smoothing parameter of the cubic spline is 0.00002; the sliding window of the linear fit is 3 hours. The growth rate trajectories in Fig. 4C were calculated by the same processing steps as in the green spectrum.

#### False Detection Rate (FDR) of g- and g'-test

We tested the FDR of the conventional g-test and the modified g'-test with the random trajectories of Gaussian noise as well as the mean trajectories of randomly permuted single-cell trajectories. The g-test discovered 23 out of 500 cases (4.6%) in random trajectories as oscillatory with p-Value smaller than 0.05, while the g'-test with the truncated frequency window  $f_i > 0.1/\text{hour}$  discovered 29 out of 500 (5.8%). Similarly, the g'-test discovered 20 out of 500 oscillatory cases (4.0%) in the mean trajectories of permuted single-cell trajectories (using the HeLa dataset of 340 trajectories), compared with 21 out of 500 cases (4.2%) by the g-test. In summary, we concluded the FDRs of the g- and g'-test were well-calibrated.

#### Detrending the SMR data

We tried different fitting functions to detrend the SMR data and compared their goodness of fit by the Akaike Information Criterion (AIC)(Akaike, 1973). The smaller AIC represents the better fit. The third-order polynomial fits better than the linear or exponential models in all the trajectories, and the fourth-order polynomial does not improve the fit significantly than the third-order polynomial (see the figure below). Thus, we detrended the SMR trajectories by the third-order polynomial fit.

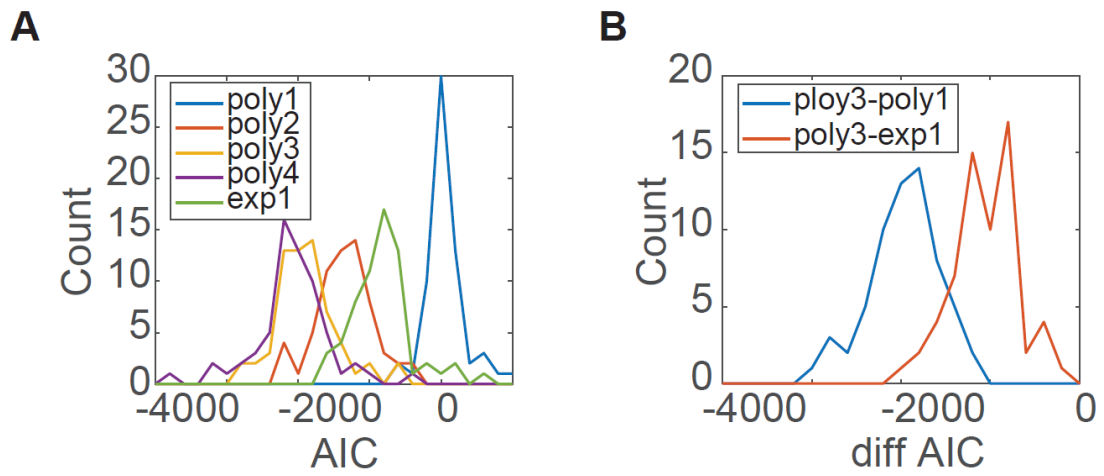

Figure. (A) The histogram of the AIC of different fitting functions. (B) The histogram of the AIC difference between the third-order polynomial and the linear (blue) or exponential (red) model.

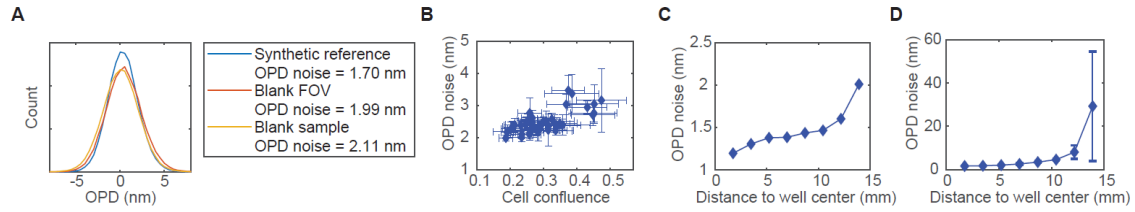

**Fig. S1.** (A) The OPD noise (the standard deviation of the OPD in the blank area) of a field of view (FOV) on a blank sample when applying a reference from the synthetic method (blue), its neighbor FOV (red), or a FOV of the same light path on another blank sample (yellow). (B) The OPD noise changes with the reference made by cell FOVs of different confluence. Each data point is from a single experiment; the error bars indicate the standard deviations of all the FOVs measured in that experiment. (C) The OPD noise of a FOV at the center of a blank 35 mm well shows a small increase when the synthetic references are made with FOVs at an increasing distance to the well center. (D) When applying the reference made by the central 1% area of the well, the OPD noise of a blank 35 mm well is less than 3.7 nm up to 10 mm distance to the well center. Error bars indicate the standard deviations of the FOVs at a certain distance.

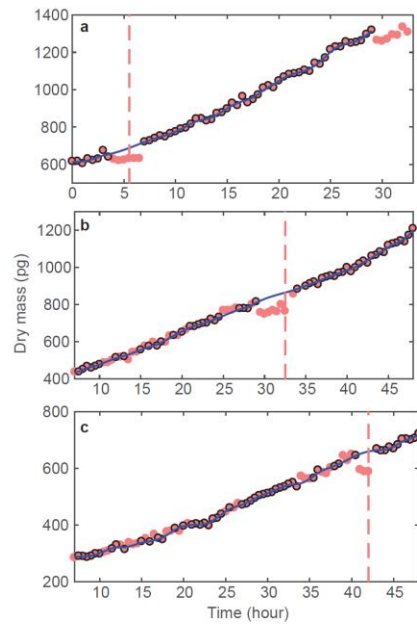

**Fig. S2.** Mass trajectories of Cell a, b, and c in Fig. 3B with the sum of their respective daughters. Solid dots are the raw data of dry mass measurement. Dots with black edge indicate the reliable data points; dots without black edge indicate the faulty data points. The sum of two contact daughters was considered as reliable. Vertical dashed lines indicate the division between the mother and the sum of the daughters. Solid lines are the spline line smoothing of the reliable data points.

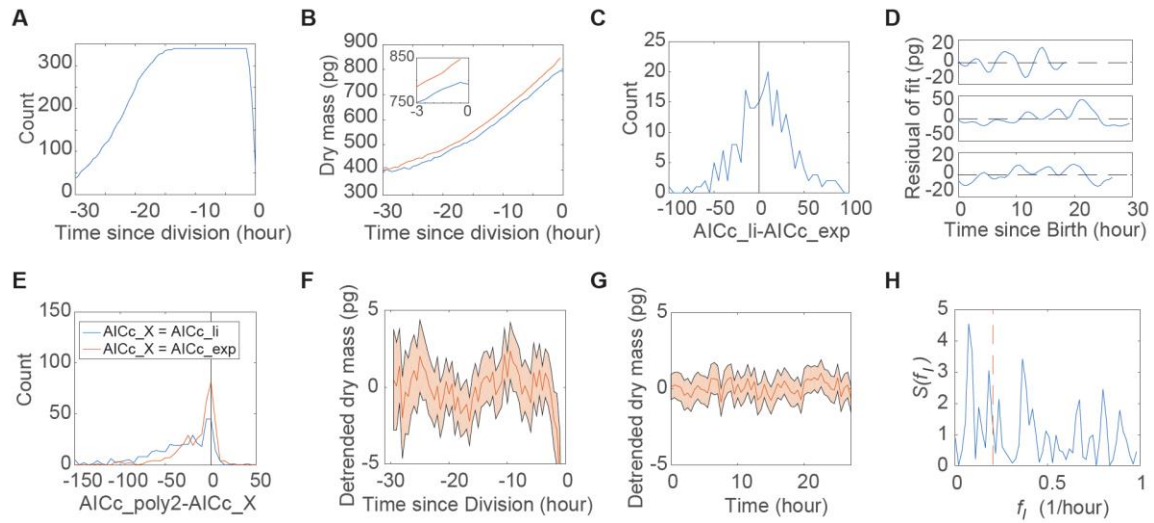

**Fig. S3.** (A) The number of data points used to calculate the mean trajectory in Fig. 4A changed with time since division. (B) The mean trajectory of the 66 cells tracked to the end of the cell cycle (blue) compared with the mean trajectory of the other 274 cells used in Fig. 4A (red). Individual trajectories were aligned to the cell division. (C) The histogram of the difference between the AICc of the linear (AICc\_li) and exponential (AICc\_exp) fit in RPE cells. (D) Examples of the residual trajectories, when the smoothed dry mass trajectories of HeLa cells were fitted by the exponential model. The horizontal dashed lines indicate residual equal to zero. (E) The histogram of the difference between the AICc of the second-order polynomial fit (AICc\_poly2) and the linear or exponential fit (AICc\_X, X=li or exp, respectively). The black vertical line indicates the difference equal to zero. (F) The mean behavior of detrended dry mass trajectories of HeLa cells aligned to cell division time. The red shaded region indicates the 95% confidence intervals of the mean.  $n = 340$ . (G) The mean behavior of detrended dry mass trajectories of fixed cells aligned to their chronological time. The red shaded region indicates the 95% confidence intervals of the mean.  $n = 564$ . (H) The periodogram of the mean trajectory in (G). The red dashed line indicates the location of  $f=0.2/\text{hour}$ .



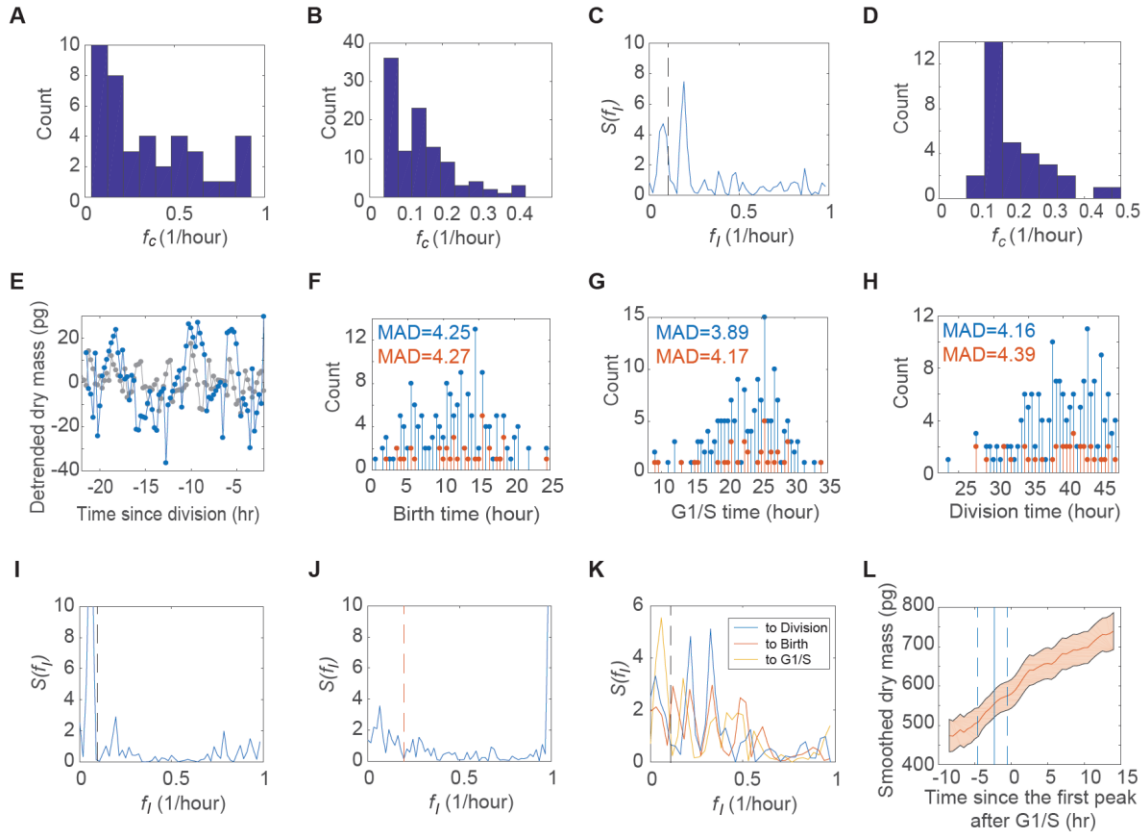

**Fig. S4.** (A, B) The histogram of the oscillation frequency,  $f_c$ , of the fixed cells (A) or live HeLa cells (B) that were identified to be oscillatory by the robust detection method. (C) The periodogram of the mean trajectory of HeLa cells aligned to their division time, after removing all the oscillatory individuals.  $n = 234$ . (D) The histogram of the oscillation frequency of live HeLa cells measured at the 15-minute interval. The individuals of  $f_c$  smaller than 0.1/hour were filtered out. The mean of the distribution is 0.212/hour. (E) Example of a single oscillatory (blue) and non-oscillatory (gray) trajectory measured at the 15-minute interval. For the oscillatory trajectory,  $p1 = 0.0011$ ,  $f_c = 0.240$ /hour. For the non-oscillatory trajectory,  $p1 = 0.4198$ . (F-H) The chronological birth (F), G1/S (G), and division (H) times of the 170 HeLa cell trajectories from a single experiment (blue), or the 32 period-shorter-than-10-hour oscillatory individuals in that experiment (red). Median Absolute Deviation (MAD) indicates the dispersion of the distribution. (I, J) The periodogram of the mean trajectory of HeLa cells from a single experiment aligned to cell division (I) or chronological time (J), respectively.  $n = 170$ . (K) The periodogram of the mean trajectory of RPE cells aligned to cell division (blue), birth (red), or G1/S (yellow), respectively.  $n = 197$ . The black dashed lines in (C, I, and K) indicate  $f_{mir} = 0.1$ /hour used in the  $g^1$ -statistic test. The red dashed line in (J) indicates the location of  $f = 0.2$ /hour. (L) The mean trajectory of the smoothed dry mass of HeLa cells under the thymidine treatment aligned to the first peak after G1/S;  $n = 51$ . The vertical blue line indicates the averaged timing of G1/S; the dashed lines are the 5 and 95% percentile. The red shaded region indicates the 95% confidence intervals of the mean.

Table S1. The weight parameters used to track HeLa cells.

| $w_D$ | $w_M$ | $w_A$ | $w_G$ |
|-------|-------|-------|-------|
| 0.03  | 2     | 0.05  | 0.1   |

Table S2. The summary of the statistical test results of the mean trajectories by the robust detection method.  $p1 = p(g > g_o)$ ,  $p2 = p(g'(f_i > 0.1) > g'_o(f_i > 0.1))$ ,  $p3 = p(g(f_i = f_x) > g_o(f_i = f_x))$ , where  $f_x$  is the closest frequency to 0.2/hour in  $f_i$ .

| Experimental condition | Dataset                             | Alignment point       | n   | N   | fc (1/hour) | Period (hour) | p1      | p2      | p3     | Average cell cycle length (hour) |
|------------------------|-------------------------------------|-----------------------|-----|-----|-------------|---------------|---------|---------|--------|----------------------------------|
| HeLa, normal           | All the trajectories                | Division              | 340 | 57  | 0.1930      | 5.18          | 0.0014  | <0.0002 |        | 26.06                            |
|                        |                                     | Birth                 |     | 54  | 0.1852      | 5.40          |         | 0.0410  |        |                                  |
|                        |                                     | G1/S                  |     | 55  |             |               |         | 0.2849  |        |                                  |
|                        | Without the oscillatory individuals | Division              | 234 | 52  | 0.1923      | 5.20          |         | 0.0018  |        |                                  |
|                        | From a single experiment            | Division              | 170 | 56  | 0.1964      | 5.09          |         | 0.0632  |        |                                  |
|                        |                                     | Chronological time    |     | 59  | 0.9831      | 1.02          | <0.0002 |         | 0.9999 |                                  |
|                        | Randomly selected                   | Division              | 188 | 51  | 0.1961      | 5.10          |         | 0.0016  |        |                                  |
| HeLa, fixed            | All the trajectories                | Unaligned             | 564 | 55  |             |               | 0.4334  |         | 0.9999 |                                  |
| HeLa, 2mM thymidine    | All the trajectories                | First peak after G1/S | 51  | 26  | 0.1923      | 5.20          |         | <0.0002 |        |                                  |
|                        |                                     | Chronological time    |     | 43  |             |               |         | 0.7622  |        |                                  |
| HeLa, 100nM Rapamycin  | All the trajectories                | Division              | 188 | 70  | 0.2286      | 4.38          |         | 0.2487  |        | 34.97                            |
| RPE, normal            | All the trajectories                | Division              | 197 | 37  | 0.3243      | 3.08          |         | 0.0794  |        | 18.9                             |
|                        |                                     | Birth                 |     | 33  |             |               |         | 0.7856  |        |                                  |
|                        |                                     | G1/S                  |     | 34  |             |               |         | 0.3647  |        |                                  |
| L1210, normal          | All the trajectories                | Birth                 | 63  | 419 | 0.2387      | 4.19          | <0.0002 |         |        | 10.42                            |
|                        |                                     | Mitotic dip           |     | 422 | 0.1777      | 5.63          | <0.0002 |         |        |                                  |

**Movie S1 (separate file).** The OPD time-lapse movie of the representative cells in Fig. 3B. Scale bar indicates 50  $\mu\text{m}$ . The time interval between frames is 30 minutes.

**Movie S2 (separate file).** HeLa cells monitored by QPM for 48 hours. Each frame is a montage of 8 X 9 OPD images of 1.184 mm X 0.888 mm FOV observed under 10X objective. The time interval between frames is 30 minutes.

## SI References

- Akaike, H. (1973). Information Theory and an Extension of the Maximum Likelihood Principle. In *Proc. 2nd Inter. Symposium on Information Theory* (pp. 267–281).
- Beier, P., Burnham, K. P., & Anderson, D. R. (2001). *Model Selection and Inference: A Practical Information-Theoretic Approach*. *The Journal of Wildlife Management* (Vol. 65).  
<https://doi.org/10.2307/3803117>
- Kalaskar, D. M., Downes, J. E., Murray, P., Edgar, D. H., & Williams, R. L. (2013). Characterization of the interface between adsorbed fibronectin and human embryonic stem cells. *Journal of the Royal Society Interface*, *10*(83). <https://doi.org/10.1098/rsif.2013.0139>
